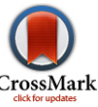

# Chemical and Genetic Discrimination of Cistanches Herba Based on UPLC-QTOF/MS and DNA Barcoding

Sihao Zheng, Xue Jiang, Labin Wu, Zenghui Wang, Linfang Huang\*

Institute of Medicinal Plant Development, Chinese Academy of Medical Sciences, Peking Union Medical College, Beijing, People's Republic of China

## Abstract

Cistanches Herba (Rou Cong Rong), known as “Ginseng of the desert”, has a striking curative effect on strength and nourishment, especially in kidney reinforcement to strengthen yang. However, the two plant origins of Cistanches Herba, *Cistanche deserticola* and *Cistanche tubulosa*, vary in terms of pharmacological action and chemical components. To discriminate the plant origin of Cistanches Herba, a combined method system of chemical and genetic –UPLC-QTOF/MS technology and DNA barcoding–were firstly employed in this study. The results indicated that three potential marker compounds (isomer of campeoside II, cistanoside C, and cistanoside A) were obtained to discriminate the two origins by PCA and OPLS-DA analyses. DNA barcoding enabled to differentiate two origins accurately. NJ tree showed that two origins clustered into two clades. Our findings demonstrate that the two origins of Cistanches Herba possess different chemical compositions and genetic variation. This is the first reported evaluation of two origins of Cistanches Herba, and the finding will facilitate quality control and its clinical application.

**Citation:** Zheng S, Jiang X, Wu L, Wang Z, Huang L (2014) Chemical and Genetic Discrimination of Cistanches Herba Based on UPLC-QTOF/MS and DNA Barcoding. PLoS ONE 9(5): e98061. doi:10.1371/journal.pone.0098061

**Editor:** Massimo Labra, University of Milano Bicocca, Italy

**Received:** February 13, 2014; **Accepted:** April 25, 2014; **Published:** May 22, 2014

**Copyright:** © 2014 Zheng et al. This is an open-access article distributed under the terms of the Creative Commons Attribution License, which permits unrestricted use, distribution, and reproduction in any medium, provided the original author and source are credited.

**Funding:** The study was supported by grants from the National Natural Science Foundation of China (No. 81274013, website: www.nsf.gov.cn). The funders had no role in study design, data collection and analysis, decision to publish, or preparation of the manuscript.

**Competing Interests:** The authors have declared that no competing interests exist.

\* E-mail: lfhuang@implad.ac.cn

## Introduction

Cistanches Herba (Rou Cong Rong), known as “Ginseng of the desert”, originates from dried succulent stems of *Cistanche deserticola* Y.C. Ma and *Cistanche tubulosa* (Schrenk) Wig according to the Chinese Pharmacopoeia (2010 edition), and is popular for its tonifying the kidney-yin, benefiting life essence and relaxing bowel. Currently, Cistanches Herba is mainly distributed in arid and warm deserts in northwest China, particularly in Xinjiang and Inner Mongolia provinces. However, the two origins of Cistanches Herba differ in terms of their pharmacological activity and chemical components. Tu et al. investigated the decoction of three *Cistanche* species (*C. deserticola*, *C. tubulosa*, *Cistanche salsa*) and found that *C. tubulosa* showed the lowest effect in the Yang-deficiency mouse model [1]. Zhang et al. compared pharmacological activity between *C. deserticola*, *C. tubulosa* and *C. salsa*, and found that these species had medicinal functions such as anti-fatigue and hypoxia tolerance, but not on the same extent [2]. Previous research reported the chemical component, and indicated the difference of chemical component and content for plant origins of Cistanches Herba [3]. As for the clinical application and market circulation, as a tonic, *C. tubulosa* has been traditionally used as a blood circulation-promoting agent and in the treatment of impotence, sterility, lumbago, body weakness in Japan [4–8].

Consequently, it is of great significance to discriminate two origins of Cistanches Herba for the quality control and clinical application. However, there is no research focus on discrimination of two origins of Cistanches Herba. Many researched methods, including microscopy, ultraviolet and infrared detection, inter-simple sequence repeats method have been used to identify the genus of Cistanches, but not only for two origins specially [9–20].

Here, we conjunctively utilized chemical and molecular techniques to distinguish two origins of Cistanches Herba, UPLC-QTOF/MS (ultra-performance liquid chromatography coupled with quadrupole time-of-flight mass spectrometry) and DNA barcoding. UPLC-QTOF/MS provides information more rapidly and efficiently compared with other techniques. The high selectivity and sensitivity of UPLC-QTOF/MS have resulted in its application for both quantitative and qualitative analyses, as well as in metabolite analysis and identification of complex compounds in Traditional Chinese Medicine [21–22]. Principal component analysis (PCA) and orthogonal projection to latent structure-discriminant analysis (OPLSDA) are also developed to identify potential marker compounds. DNA barcoding, an easier and more universal molecular marker technology, uses a DNA fragment to identify species or genera. It is objective, more accurate, and easier to perform than traditional identification methods and other molecular marker technologies. Moreover, DNA barcoding has successfully been applied to identify animal and plant, including medicinal plants [23–26].

The purpose of this research is to establish a scientific method system, combined UPLC-QTOF/MS and DNA barcoding, for discrimination of two plant origins of Cistanches Herba.

## Materials and Methods

### Ethics statement

We confirm that the field studies did not involve endangered or protected species. GPS coordinates have included in the sample information, please see table 1."

**Table 1.** Samples of *Cistanche deserticola* and *Cistanche tubulosa*.

| No.     | Family        | Species               | Sources               | GPS coordinates    | GenBank accession number   |
|---------|---------------|-----------------------|-----------------------|--------------------|----------------------------|
| R11-R13 | Orobanchaceae | <i>C. deserticola</i> | WLMQ Xinjiang         | E:87.69° W:43.75°  | KF289954–KF289956          |
| R21-R23 | Orobanchaceae | <i>C. deserticola</i> | GJH Xinjiang          | E:83.37° W:44.81°  | KF289957,KF289958(R22)     |
| R51-R56 | Orobanchaceae | <i>C. deserticola</i> | HBKSEMG Xinjiang      | E:85.55° W:46.69°  | KF574740–KF574745          |
| R61-R66 | Orobanchaceae | <i>C. deserticola</i> | KLMY Xinjiang         | E:84.84° W:45.59°  | KF574746–KF574749(R61,R62) |
| R71-R82 | Orobanchaceae | <i>C. deserticola</i> | BDJLSM Inner-Mongolia | E:102.62° W:39.72° | KF574750–KF574760(R79)     |
| R31-R33 | Orobanchaceae | <i>C. deserticola</i> | ALSZQ Inner-Mongolia  | E:105.63° W:38.83° | KF289959–KF289961          |
| R41-R43 | Orobanchaceae | <i>C. deserticola</i> | BDJLSM Inner-Mongolia | E:102.16° W:39.66° | KF289965–KF289964          |
| G11-G13 | Orobanchaceae | <i>C. tubulosa</i>    | DSX Xinjiang          | E:88.82° W:43.87°  | KF289945–KF289947          |
| G21-G22 | Orobanchaceae | <i>C. tubulosa</i>    | CL Xinjiang           | E:80.83° W:36.96°  | KF289948,KF289949          |
| G31-G33 | Orobanchaceae | <i>C. tubulosa</i>    | MF Xinjiang           | E:82.69° W:37.08°  | KF289950–KF289952          |
| G41-G43 | Orobanchaceae | <i>C. tubulosa</i>    | HT Xinjiang           | E:79.80° W:37.03°  | KF289953(R41,R42)          |

WLMQ meant Wu Lu Mu Qi city; GJH meant Gan Jia Hu; HBKSEMG meant Hoboksar Mongol Autonomous County; KLMY meant Ke La Ma Yi city; BDJLSM meant Badain Jaran Desert; ALSZQ meant Alxa Left Banner; DSX meant Dong San county; CL meant Ce Le county; MF meant Min Feng county; HT meant He Tian county.  
doi:10.1371/journal.pone.0098061.t001

### Plant materials and reagents

Succulent stems of *Cistanches Herba* were collected from wild desert region in Inner Mongolia, Qinghai Provinces, Xinjiang Uygur Autonomous Region, People's Republic of China (Table 1) in May 2012. The samples of the research were all collected in wild desert region, not in private land, where no specific permissions were required. The botanical identities of the stems were confirmed by Dr. Linfang Huang. Voucher specimens were deposited at The Institute of Medicinal Plant Development. High-performance liquid chromatography (HPLC)-grade acetonitrile (Merck KGaA, Darmstadt, Germany) and formic acid (Tedia, USA) were utilized for UPLC analysis. Deionized water was purified using a Milli-Q system (Millipore, Bedford, MA, USA). All other chemicals were of analytical grade.

### Sample preparation

*Cistanches Herba* samples (1.0 g, 65-mesh) were transferred into a 50-mL conical flask, and 50 mL of 70% methanol was added. After soaking for 30 min, ultrasonication (35 kHz) was performed at room temperature for 30 min. After centrifugation at 10,000 rev/min for 10 min, the supernatant was stored at 4°C and filtered through a 0.22- $\mu$ m membrane before injection into the UPLC-QTOF/MS system for analysis.

### UPLC-QTOF/MS

For UPLC analysis, the following systems/parameters were used: Waters Acquity system (Waters) equipped with a binary solvent delivery pump, auto-sampler and PDA detector connected to a Waters Empower 2 data station; ultrasonication (250 W, 50 kHz, Kunshan Ultrasonic Instrument Co., Zhejiang, China); and an electronic analytical balance model AB135-2 (Mettler-Toledo, Greifensee, Zurich, Switzerland). A Waters Acquity UPLC BEH C<sub>18</sub> column (1.7  $\mu$ m, 2.1 $\times$ 100 mm, Waters) and a Waters C<sub>18</sub> guard column (same material, waters) were used and maintained at 30°C. The mobile phase was 0.1% formic acid aqueous solution (A) and acetonitrile (B) with a gradient program as follows: 0–3 min, 10–22% B; 3–4 min, 22–23% B; 4–6 min, 23–35% B; 6–8 min, 35–37% B; 8–11 min, 37–42% B; 11–12 min, 42–48% B; 12–15 min, 48%–50% B at a flow rate of 0.3 mL/min. The injection volume was 5  $\mu$ L.

The UPLC/MS analysis was performed on a QTOF Synapt G2 HDMS system (Waters, Manchester, UK) equipped with an electrospray ionization (ESI) source operated in the negative-ion mode. N<sub>2</sub> was used as the desolvation gas. The desolvation temperature was set at 450°C at a flow rate of 800 L/h, and the source temperature was set at 120°C. The capillary and cone voltages were set to 2500 and 40 V, respectively. Data were collected between 50–1200 Da with a 0.1-s scan time and a 0.01-s interscan delay over a 15-min analysis time. Argon was used as the collision gas at a pressure of 7.06661023 Pa. All MS data were collected using the LockSpray system to ensure mass accuracy and reproducibility. The [M-H]<sup>-</sup> ion of leucine-enkephalin at m/z 554.2615 was used as the lock mass in negative ESI mode.

### Data analysis

UPLC-QTOF/MS data for *Cistanches Herba* samples were analyzed to identify potential discriminant variables. Peak finding, alignment and filtering of ES raw data were carried out using the Marker Lynx applications manager, version 4.1 (Waters, Manchester, UK). The parameters used were as follows: retention time (t<sub>R</sub>) of 0–15 min, mass of 50–1200 Da, retention time tolerance of 0.02 min, and mass tolerance of 0.02 Da. Three replicate samples collected from each geographic location were used (n = 3). A total of 6, 339 variables were used to create the model.

### DNA barcoding: DNA extraction, PCR amplification and sequencing

Samples taken from dried fleshy stems of *C. deserticola* and *C. tubulosa* (30 mg) were rubbed for 2 minutes at a frequency of 30 r/s. DNA was extracted according to the manufacturer's instructions (Tiangen). Specifically, the protocol was modified such that chloroform was replaced with a mixture of chloroform: isoamyl alcohol (24:1 in the same volume), and buffer solution GP2 with isopropanol (same volume). The rubbed powder was put into 1.5 ml eppendorf tubes, added 700  $\mu$ L 65°C preheated GP1 and 1  $\mu$ L  $\beta$ -mercaptoethanol to mix using vortex for 10–20 s, and incubated for 60 minutes at 65°C; Adding 700  $\mu$ L mixture of chloroform: isoamyl alcohol (24:1), centrifuge for 5 minutes at 12000 rpm (~13400 $\times$ g); Pipette supernatant to a new tube, adding 700  $\mu$ L isopropanol, blending for 15–20 minutes; Piping all the mixture into spin column CB3 and centrifuge for 40 s at

12000 rpm; Discarding the filtrate and adding 500  $\mu$ L GD (adding quantitative anhydrous ethanol before use), centrifuge at 12000 rpm for 40 s; discarding the filtrate and adding 700  $\mu$ L PW (adding quantitative anhydrous ethanol before use) to wash the membrane, centrifuge for 40 s at 12000 rpm; Discarding the filtrate and adding 500  $\mu$ L PW, centrifuge for 40 s at 12000 rpm; Discarding the filtrate and centrifuge for 2 minutes at 12000 rpm to remove residual wash buffer PW; Transferring the spin column CB3 into a clean 1.5 ml eppendorf tube, and drying at room temperature for 3–5 minutes; Centrifuge for 2 minutes at 12000 rpm to obtain the total DNA. Primers for polymerase chain reaction (PCR) were based on sequences reported previously [4,5]. PCR reaction mixtures contained 2- $\mu$ L DNA template, 8.5- $\mu$ L ddH<sub>2</sub>O, 12.5- $\mu$ L 2 $\times$  Taq PCR Master Mix (Beijing TransGen Biotech Co., China), 1/1- $\mu$ L forward/reverse (F/R) primers (2.5  $\mu$ M), in a final volume of 25  $\mu$ L. PCR amplification was conducted as described by Kress et al. [4]. The primer of PCR reaction were fwd PA: GTTATGCATGAACGTAATGCTC (5'-3') and rev TH: CGCGCATGGTGGATTCACAATCC (5'-3'). PCR products were separated and detected by 1% agarose gel electrophoresis. PCR products were purified following the manufacturer's protocol and directly subjected to sequencing.

### Sequence alignment and analysis

ITS and ITS2 sequences were collected from the GenBank database. Sequences from sequencing of the samples were submitted to GenBank database (Accession numbers were listed in table 1), assembled with CodonCode Aligner 3.7.1 (CodonCode Co., USA) and aligned using ClustalW. Kimura 2-Parameter (K2P) distances, GC content of base and Neighbor-joining (N-J) trees were calculated and constructed using the MEGA 5.05 with the Bootstrap method (1000 resampling) and K2P model [27]. Barcoding gap (spacer region that was formed between intra- and inter-specific genetic variations) and identification efficiency (the ability of identification for comparing different barcodes) were

drawn and calculated based on the method reported by Meyer and Paulay [28].

## Results

### Tentative peak assignment by UPLC-QTOF/MS

Representative chromatograms of *C. deserticola* and *C. tubulosa* from different producing areas are shown in Figure 1. The fingerprint chromatogram indicated similarities among *Cistanches Herba* samples. A total of 23 qualified mass peaks were detected and 16 peaks were identified by matching the retention times and mass spectra with those reported previously (Table 2) [29–35]. Peaks 2, 3, 5, 6, 7, 8, 9, 11, 12, 15, 16, 17, 20, 21, 22, and 23 were tentatively identified as cistanoside F, mussaenoside acide, cistanbuloside C1/C2, campneoside II, isomer of campneoside II, echinacoside, cistanoside A, acteoside, isoacteoside, syringalide A-3'- $\alpha$ -L-rhamnopyranoside, cistanoside C, 2'-acetylacteosid, osmanthuside B, cistanoside D, tubuloside B, and cistanacinenside A, respectively. Chemical constituents were determined to be primarily phenylethanoid glycosides (PhGs), while one compound, mussaenoside acide, was an iridoid polysaccharide. PhGs are the main active compounds in terms of treatment of kidney deficiency, and antioxidant and neuroprotective effects [36].

### PCA of *C. deserticola* and *C. tubulosa*

PCA was employed to distinguish samples of different plant species. PCA is an unsupervised multivariate data analysis method that aims to visualize the similarities and/or differences within multivariate data of secondary metabolite composition [37]. The two-component PCA model cumulatively accounted for 46.04% of the variation (PC1, 36.43%; PC2, 9.61%). Figure 2 shows that 24 samples were clustered into two groups in the PCA scores plotted according to species origin, indicating that the chemical composition of *C. deserticola* and *C. tubulosa* differed significantly.

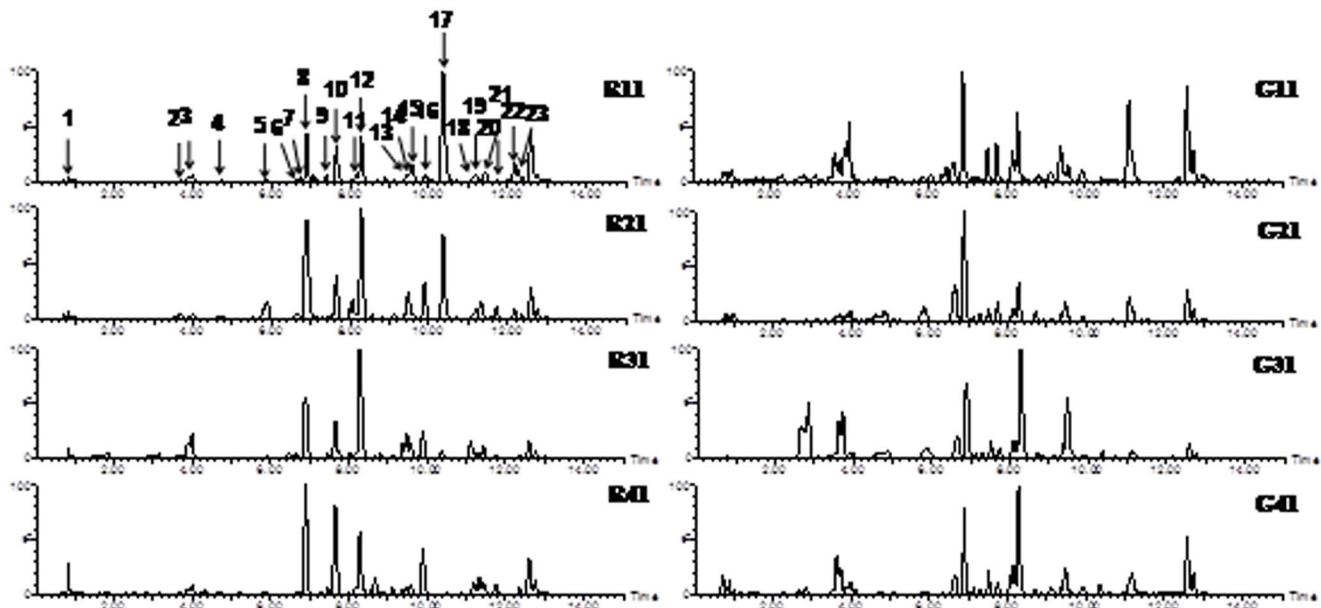

**Figure 1. The representative chromatograms of *C. deserticola* and *C. tubulosa*.** The left side were the chromatograms of *C. deserticola* collected from different locations; the right side were the chromatograms of *C. tubulosa* collected from different locations. This figure shows the differences between these two origins in chemical profiles.  
doi:10.1371/journal.pone.0098061.g001

**Table 2.** Tentatively identified compounds from *C. deserticola* and *C. tubulosa*.

| Peak no. | $t_R$ (min) | Name                                           | Formula                                         | [M-H] <sup>-</sup> m/z |          | Theoretical exact mass(Da) ppm | Fragments m/z                                                        | Reference |
|----------|-------------|------------------------------------------------|-------------------------------------------------|------------------------|----------|--------------------------------|----------------------------------------------------------------------|-----------|
|          |             |                                                |                                                 | Mean measured mass(Da) |          |                                |                                                                      |           |
| 1        | 0.84        | unknown                                        | C <sub>12</sub> H <sub>22</sub> O <sub>11</sub> | 341.1078               | 341.1084 | -1.8                           | 195.0512, 179.0585                                                   |           |
| 2        | 3.69        | cistanoside F                                  | C <sub>21</sub> H <sub>28</sub> O <sub>13</sub> | 487.1454               | 487.1452 | 0.4                            | 179.0355                                                             | [13]      |
| 3        | 4.00        | mussaenoside acide                             | C <sub>16</sub> H <sub>24</sub> O <sub>10</sub> | 375.1289               | 375.1291 | -0.5                           | 235.0561, 213.0758, 191.0689, 169.0860                               | [14]      |
| 4        | 4.87        | unknown                                        | C <sub>34</sub> H <sub>28</sub> O               | 691.2054               | 691.2062 | -1.2                           | 307.0252, 161.0243                                                   | [15]      |
| 5        | 5.89        | cistanbulosideC1/C2                            | C <sub>35</sub> H <sub>46</sub> O <sub>21</sub> | 801.2449               | 801.2453 | -0.5                           | 621.2043, 201.0146, 179.0353, 161.0230                               | [16]      |
| 6        | 6.58        | campneoside II                                 | C <sub>47</sub> H <sub>28</sub> O <sub>3</sub>  | 639.1947               | 639.1960 | -2.0                           | 621.2183, 179.0359, 161.0235                                         | [16]      |
| 7        | 6.66        | Isomer of campneoside II                       | C <sub>47</sub> H <sub>28</sub> O <sub>3</sub>  | 639.1947               | 639.1960 | -2.0                           | 621.2183, 179.0359, 161.0235                                         | [16]      |
| 8        | 6.89        | echinacoside                                   | C <sub>35</sub> H <sub>46</sub> O <sub>20</sub> | 785.2517               | 785.2504 | 1.7                            | 623.2201, 477.1612, 461.1643, 161.0244, 135.0445                     | [16-18]   |
| 9        | 7.64        | cistanoside A                                  | C <sub>36</sub> H <sub>48</sub> O <sub>20</sub> | 799.2673               | 799.2661 | 1.5                            | 637.2346, 623.2080, 491.1746, 161.0241                               | [16-18]   |
| 10       | 7.51        | unknown                                        | C <sub>22</sub> H <sub>38</sub> O <sub>12</sub> | 493.2274               | 493.2285 | -2.2                           | -                                                                    |           |
| 11       | 8.28        | acteoside                                      | C <sub>29</sub> H <sub>36</sub> O <sub>15</sub> | 623.1989               | 623.1976 | 2.1                            | 421.1646, 319.0787, 161.0237                                         | [16-18]   |
| 12       | 9.48        | isoacteoside                                   | C <sub>29</sub> H <sub>36</sub> O <sub>15</sub> | 623.1989               | 623.1976 | 2.1                            | 421.1646, 319.0787, 161.0237                                         | [16-18]   |
| 13       | 8.78        | unknown                                        | C <sub>16</sub> H <sub>26</sub> O <sub>8</sub>  | 345.1552               | 345.1549 | 0.9                            | 205.0836, 179.0338, 161.0226                                         |           |
| 14       | 9.36        | unknown                                        | C <sub>16</sub> H <sub>26</sub> O <sub>8</sub>  | 345.1548               | 345.1549 | -0.3                           | 247.0938, 205.0836, 165.0902, 161.0236                               |           |
| 15       | 9.57        | syringalide A-3'- $\alpha$ -L-rhamnopyranoside | C <sub>29</sub> H <sub>36</sub> O <sub>14</sub> | 607.2023               | 607.2027 | -0.7                           | 445.1716, 299.1123, 201.0165, 161.0235                               | [16]      |
| 16       | 9.89        | cistanoside C                                  | C <sub>30</sub> H <sub>38</sub> O <sub>15</sub> | 637.2137               | 637.2132 | 0.8                            | 475.1777, 461.1655, 315.1072, 179.0344, 161.0245                     | [16]      |
| 17       | 10.35       | 2'-acetyllacteosid                             | C <sub>31</sub> H <sub>38</sub> O <sub>16</sub> | 665.2086               | 665.2082 | 0.6                            | 645.1805, 623.2011, 503.1779, 461.1668, 315.1097, 179.0339, 161.0242 | [16-18]   |
| 18       | 11.09       | unknown                                        | C <sub>16</sub> H <sub>26</sub> O <sub>8</sub>  | 347.1076               | 347.1706 | 0                              | 369.1531, 347.1715, 207.1012, 161.0245                               |           |
| 19       | 11.31       | unknown                                        | C <sub>30</sub> H <sub>38</sub> O <sub>15</sub> | 637.2135               | 637.2132 | 0.5                            | 637.2114, 591.2069, 487.3010, 451.3267                               |           |
| 20       | 11.43       | osmanthuside B                                 | C <sub>29</sub> H <sub>36</sub> O <sub>13</sub> | 591.2076               | 591.2078 | -0.3                           | 467.1423, 45.1707, 161.0224, 145.0284                                | [16]      |
| 21       | 11.74       | cistanoside D                                  | C <sub>31</sub> H <sub>40</sub> O <sub>15</sub> | 651.2287               | 651.2289 | -1.7                           | 677.4901, 527.1442, 351.1073, 175.0393                               | [19]      |
| 22       | 12.17       | tubuloside B                                   | C <sub>31</sub> H <sub>38</sub> O <sub>16</sub> | 665.2086               | 665.2082 | 0.6                            | 461.1709, 161.0244                                                   | [16]      |
| 23       | 12.38       | Cistanchinenside A                             | C <sub>32</sub> H <sub>40</sub> O <sub>16</sub> | 679.2253               | 679.2238 | 2.2                            | 677.4927, 659.1908, 179.0355, 161.0236                               | [15]      |

doi:10.1371/journal.pone.0098061.t002



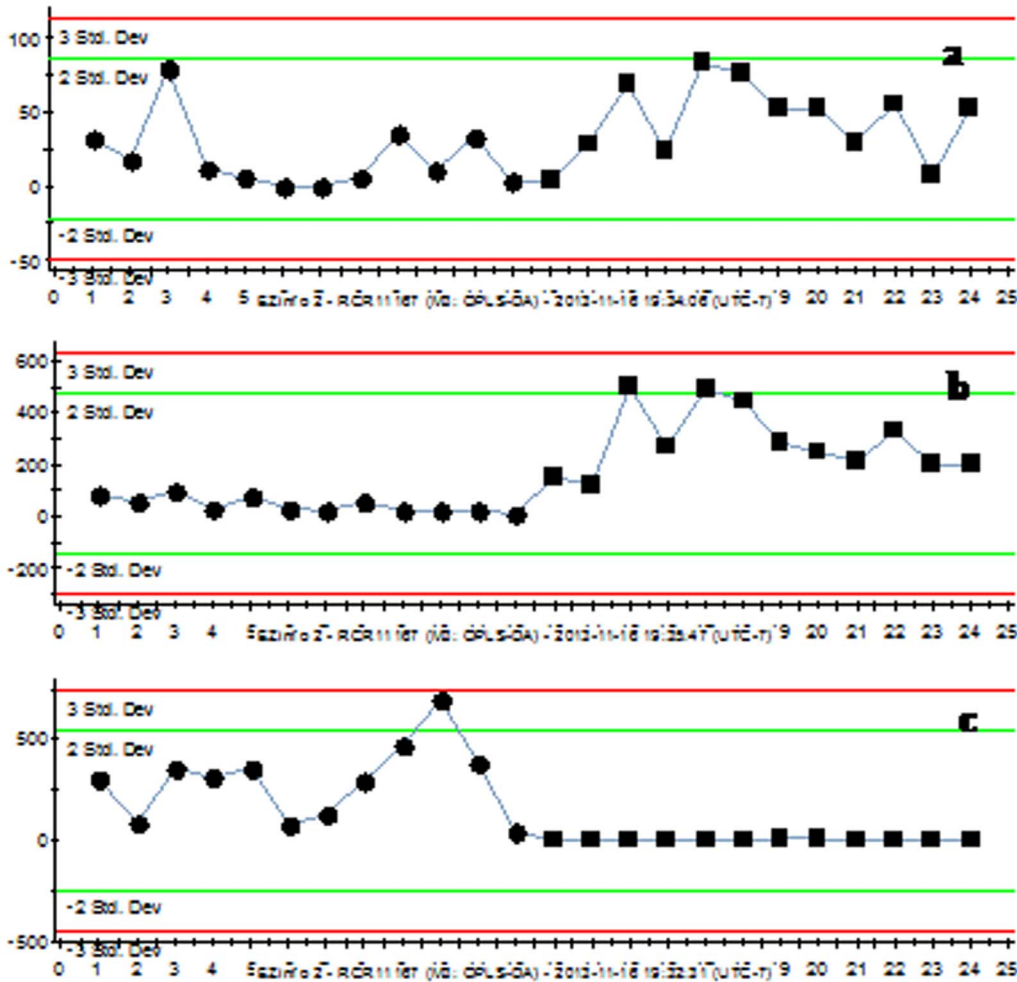

**Figure 4. Ion intensities of markers a, b and c.** The ion intensities of marker ions **a** and **b** in *C. deserticola* was higher than that in *C. Tubulosa*, and the marker ion **c** could be detected in *C. tubulosa*, but could not be detected in *C. deserticola*. doi:10.1371/journal.pone.0098061.g004

**DNA barcoding: sequence information and identification efficiency**

Sequence information was shown in Table 4. The average genetic distance of *psbA-tmH* (0.1732) was larger than other two regions (0.0740, 0.1197) significantly. The average GC content of *psbA-tmH* (20.64%) was smaller than other two regions (55.00%, 55.00%). Though the success rate of ITS and ITS2 was not obtained in this study, the *psbA-tmH* region performed well in PCR amplification and sequencing (100%, 87.23%). Identification efficiency was achieved by BLAST1 analysis and the nearest-distance method, and mainly reflected the success rate of the barcodes. The *psbA-tmH* region was clearly higher than the other two barcodes in identification efficiency based on two methods. The shortage of sequences is most likely the reason that ITS region

exhibited 100% identification efficiency based on BLAST1 method, and 0 based on the nearest-distance method.

**Analysis of genetic divergence using six parameters**

Six parameters were used to analyze intra-specific variation and inter-specific divergence using three barcodes (Table 5). The significant difference between inter- and intra-specific variations was indicative of the utility of the DNA barcodes. Here, the minimum interspecific distance of three barcodes was all higher than the maximum intraspecific distance. Moreover, *psbA-tmH* region had larger maximum intraspecific distance and average interspecific distance than the other two barcodes, indicated that *psbA-tmH* region performed well in discrimination of two origins of Cistanches Herba.

**Table 3. Marer  $t_R$ -m/z ion pairs in the S-plot.**

| Species               | Marker ions                                   |
|-----------------------|-----------------------------------------------|
| <i>C. deserticola</i> | 7.64–799.2667a; 9.88–637.2135b; 0.84–341.1081 |
| <i>C. tubulosa</i>    | 6.66–639.1929c; 8.15–493.2284; 4.27–405.0499  |

doi:10.1371/journal.pone.0098061.t003

**Table 4.** Identification efficiency of three loci using different methods for species identification.

| Markers                           |                  | ITS     | ITS2    | <i>psbA-trnH</i> |
|-----------------------------------|------------------|---------|---------|------------------|
| Number of sequences               |                  | 4       | 18      | 37               |
| Length range/bp                   |                  | 617–622 | 235–236 | 358–558          |
| Average GC content                |                  | 55.00%  | 55.00%  | 20.64%           |
| Efficiency of PCR amplification/% |                  | /       | /       | 100              |
| Success rate of sequencing/%      |                  | /       | /       | 87.23            |
| Genetic distance                  | Min              | 0.0016  | 0.0000  | 0.0000           |
|                                   | Max              | 0.1280  | 0.2379  | 0.5279           |
|                                   | Average          | 0.0740  | 0.1197  | 0.1732           |
| Identification efficiency/%       | BLAST1           | 5.56    | 0       | 29.73            |
|                                   | Nearest Distance | 100     | 5.56    | 100              |

doi:10.1371/journal.pone.0098061.t004

### Analysis of barcoding gap to identify *C. deserticola* and *C. tubulosa*

The barcoding gap presents the remarkable variation of inter- and intra-species, and demonstrates that separate, non-overlapping distributions between intra- and inter-specific samples. In this study (Fig. 5), the distance range was set to 0–0.45, because the greatest K2P distance of *psbA-trnH* between *C. deserticola* and *C. tubulosa* was close to 0.45. The three barcodes exhibited distinct gaps in the distributions of intra- and inter-specific variation. Furthermore, the gap of *psbA-trnH* was significantly larger than other two barcodes. Therefore, *psbA-trnH* region could be an ideal barcode for discriminating two origins of Cistanches Herba.

### Neighbor-joining (NJ) tree

An NJ tree illustrates the relationship among species and facilitates determination of their clustering. In this study, NJ tree of three barcodes were built based on K2P model (Fig. 6). The results demonstrated that two origins of Cistanches Herba clustered into two clades separately. Thus, the NJ tree clearly distinguished between *C. deserticola* and *C. tubulosa*.

### Discussion and Conclusions

Cistanches Herba is an important medicinal material commonly used to nourish in the Asian community [38]. However, the two origins of Cistanches Herba, *C. deserticola* and *C. tubulosa*, have different chemical compositions and pharmacological activities respectively. Concurrently, the two origins differ in clinical application and commodity market. The classification of *Cistanche* is confused and massive substitute and adulterants flood the

market due to the shortage of resources and special growing environment for Cistanches Herba. Genus of *Cistanche* is accepted to include four species and one variant: *C. deserticola*, *C. tubulosa*, *C. sinensis*, *C. salsa*, and *C. salsa var. albiflora* [39]. Researchers in Japan considered the origin of Cistanches Herba as *C. salsa* [40–43], while it was identified as *C. deserticola* by Tu [44–46]. Therefore, it is confused in classification of *Cistanche*, and it is hard to discriminate the two origins of Cistanches Herba.

Traditional methods for quality control of Cistanches Herba are morphological identification [47,48], microscopic identification [49] and TLC (Thin-Layer Chromatography) [50,51], FTIR (Fourier Transform Infrared Spectroscopy) [14], HPLC (High Performance Liquid Chromatography) [52,53]. Morphological and microscopic method can easily differentiate species from different genera or families that possess big difference in morphological and microscopic characteristics, while it is hard to distinguish sibling species. TLC and FTIR can clearly discriminate species that possess different kind of chemical compositions, whereas it is difficult to determine the chemical component and content. HPLC is mainly used for differentiating species with different chemical element contents, nevertheless, the time of analysis is longer and the sensitivity is relatively lower compared to UPLC. Correspondingly, UPLC-QTOF/MS technology was faster and more accurate in determining chemical composition than other chemical methods. Molecular identification methods exhibit well in discrimination based on the genetic variation, such as SDS-PAGE (Sodium Dodecyl Sulfate-Polyacrylamide Gel Electrophoresis) [54], AFLP (Amplified Fragment Length Polymorphism) [55,56]. However, these molecular methods are not easy to operate and are not universal. Correspondingly, DNA

**Table 5.** Analysis of interbygenus-specific divergence and intra-specific variation of three barcodes.

| Markers                                                | ITS           | ITS2   | <i>psbA-trnH</i> |
|--------------------------------------------------------|---------------|--------|------------------|
| Theta (avg_intra_avg)                                  | 0.0225        | 0.0000 | 0.0091±0.0019    |
| coalescent depth (avg_intra_max)                       | 0.0338        | 0.0000 | 0.0539±0.0013    |
| All intraspecific distance (avg_between_intra-species) | 0.0225±0.0181 | 0.0000 | 0.0102±0.0100    |
| Theta prime (avg_interbyG_avg)                         | 0.1258±0.0181 | 0.2381 | 0.4090±0.0100    |
| minimum interspecific distance (avg_interbyG_min)      | 0.1235±0.0181 | 0.2381 | 0.2345±0.0100    |
| all inter-specific distance (avg_between_interbyG)     | 0.1258±0.0025 | 0.0000 | 0.4090±0.0476    |

doi:10.1371/journal.pone.0098061.t005

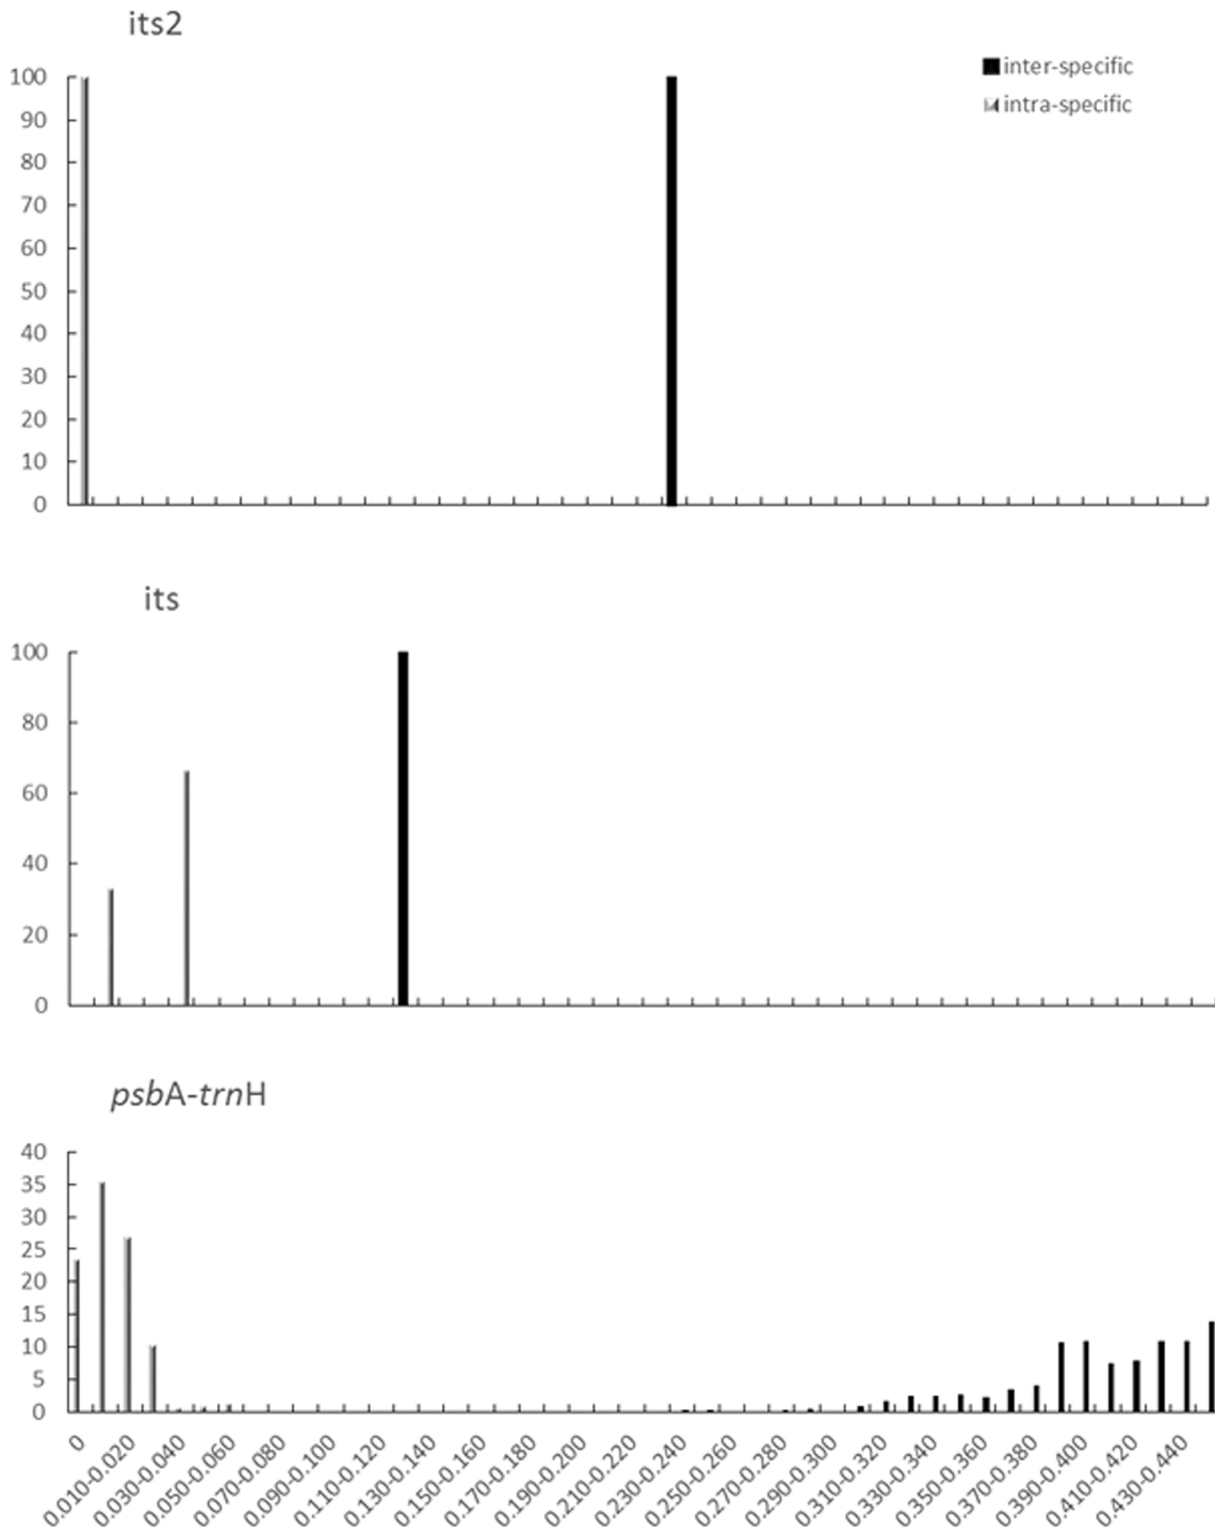

**Figure 5. Relative distribution of inter-specific divergence and intra-specific variation in three barcodes.** Three barcodes of ITS2, ITS, *psbA-trnH* were analyzed for relative distribution of inter-specific divergence and intra-specific variation between *C. deserticola* and *C. tubulosa* based on the K2P genetic distance.  
doi:10.1371/journal.pone.0098061.g005

barcoding could discriminate species more universally, quickly and accurately than other molecular methods. For the species from same genus and close genetic relationship, those methods alone

may not perform well in identification. Here, we combined UPLC-QTOF/MS and DNA barcoding in identifying *C. deserticola* and *C. tubulosa*, and evaluated the chemical and molecular markers



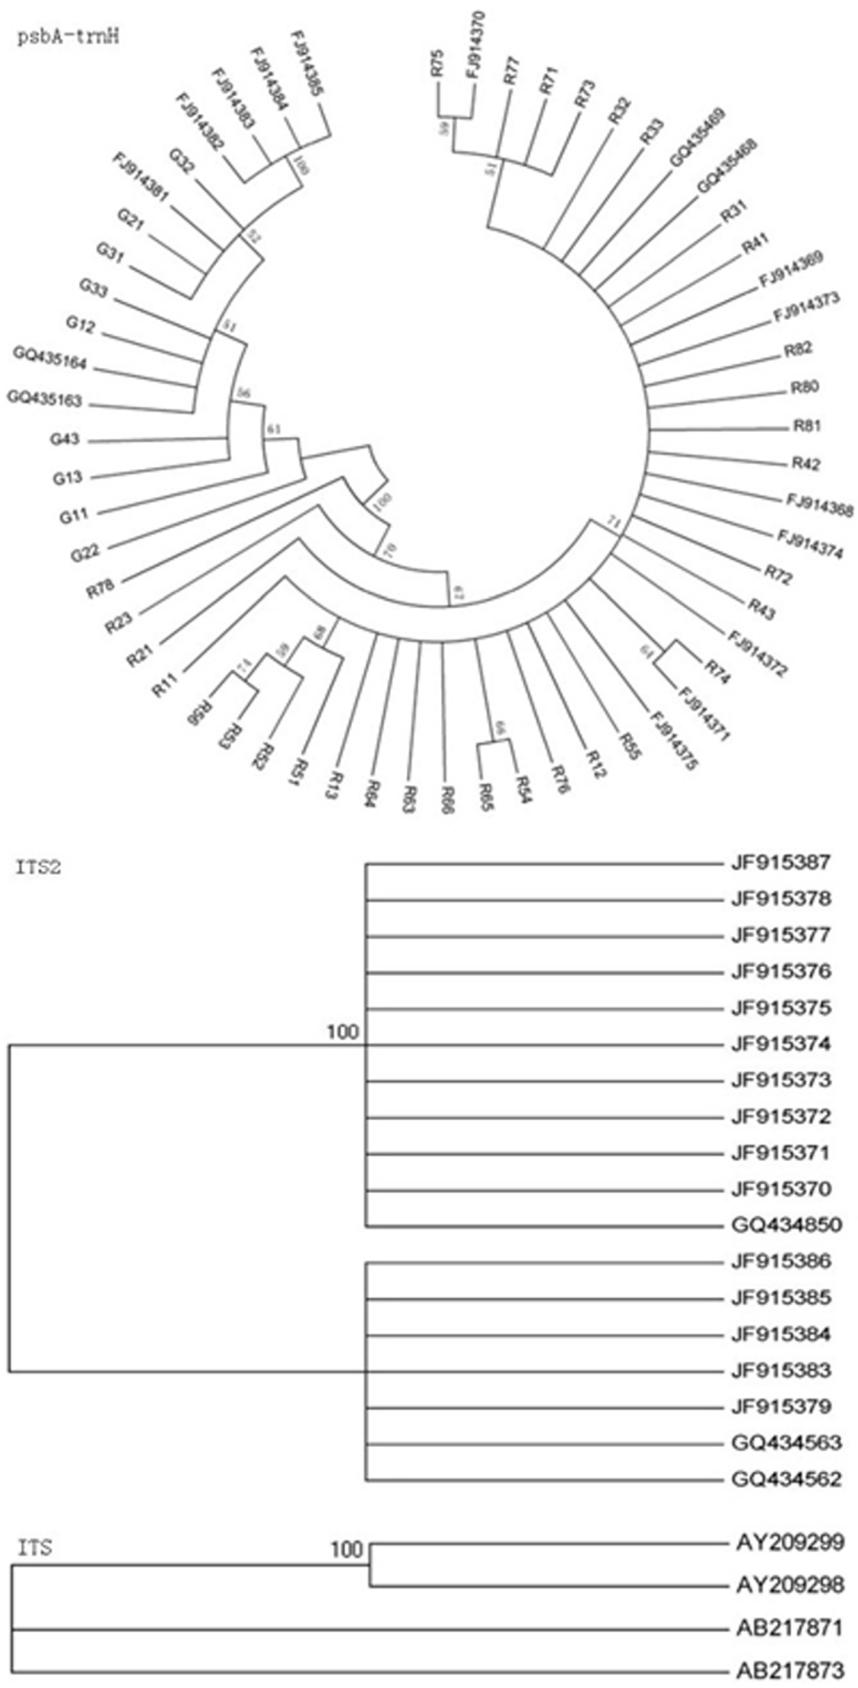

**Figure 6. NJ tree of *C. deserticola* and *C. tubulosa* with three barcodes.** NJ tree of *C. deserticola* and *C. tubulosa* with three barcodes were built. The bootstrap scores (1000 replicates) are shown ( $\geq 50\%$ ) for each branch. *C. deserticola* and *C. tubulosa* were clustered into two clades clearly. doi:10.1371/journal.pone.0098061.g006

that would allow them to be discriminated. 23 qualified mass peaks were detected and 16 were identified by using UPLC-QTOF/MS, and three potential marker compounds were firstly found to facilitate the discrimination of two origins by PCA and OPLS-DA analysis. Furthermore, four indicators were assessed by DNA barcoding technology in terms of their ability to differentiate two origins: Identification efficiency, genetic efficiency, barcoding gap, and NJ tree analysis. The *psbA-trnH* region was supported as a suitable DNA barcode for discriminating *C. deserticola* and *C. tubulosa*.

In conclusion, we firstly established a new molecular and chemical analysis-combined method for discriminating and quality control in two origins of Cistanches Herba. DNA barcoding can discriminate two origins in genetic variation and authentic

species universally and accurately; UPLC-QTOF/MS technology can analyze chemical composition to evaluate the quality of medicinal materials rapidly and accurately. The combined method of DNA barcoding and UPLC-QTOF/MS technology guarantee the identification in multiple sources of medicinal materials more accurately and scientifically, and may serve as method for identifying other confusing species or genus in classification.

## Author Contributions

Conceived and designed the experiments: LFH SHZ LBW. Performed the experiments: SHZ LBW. Analyzed the data: SHZ LBW. Contributed reagents/materials/analysis tools: LFH. Wrote the paper: SHZ XJ LBW. Check the manuscript: ZHW.

## References

- Tu PF, Lou ZC, Li SC, Wang CS, Jiang WY, et al. (1996) Comparison on the kidney nourishing and yang strengthening efficacy of three different species of herba cistanches. *Journal of Chinese medicinal materials* 19: 420–421.
- Zhang Y, Wu H, Wang SN, Zheng HC (1994) Comparison on the kidney nourishing and yang strengthening functions of three different species of herba cistanches. *China Journal of Chinese Materia Medica* 19: 169–171.
- Lei L, Song ZH, Tu PF (2003) Advances in research of chemical constituents in plants of Cistanche Hoffing. et Link. *Chinese Traditional and Herbal Drugs* 34: 473–476.
- Yoshikawa M, Matsuda H, Morikawa T, Xie H, Nakamura S, et al. (2006) Phenylethanoid oligoglycosides and acylated oligosugars with vasorelaxant activity from *Cistanche tubulosa*. *Bioorg Med Chem* 14: 7468–7475.
- Shimoda H, Tanaka J, Takahara Y, Takemoto K, Shan SJ, et al. (2009) The hypocholesterolemic effects of *Cistanche tubulosa* extract, a Chinese traditional crude medicine, in mice. *Am J Chin Med* 37: 1125–1138.
- Yamada P, Iijima R, Han J, Shigemori H, Yokota S, et al. (2010) Inhibitory effect of acetoside isolated from *Cistanche tubulosa* on chemical mediator release and inflammatory cytokine production by RBL-2H3 and KU812 cells. *Planta Med*, 1512–1518.
- Morikawa T, Pan Y, Ninomiya K, Imura K, Matsuda H, et al. (2010) Acylated phenylethanoid oligoglycosides with hepatoprotective activity from the desert plant *Cistanche tubulosa*. *Bioorg Med Chem* 18: 1882–1890.
- Morikawa T, Pan Y, Ninomiya K, Imura K, Yuan D, et al. (2010) Iridoid and acyclic monoterpene glycosides, kankanosides L, M, N, O, and P from *Cistanche tubulosa*. *Chem Pharm Bull (Tokyo)* 58: 1403–1407.
- He YP, Yin ZZ, Tu PF, Lou ZC (1997) Identification and survey of commercial crude drug of herba cistanchis. *Journal of Chinese medicinal materials* 20: 117–122.
- Zhu SY (2001) Pharmacognostical identification of *Cistanche tubulosa* a confused species of *Cistanche deserticola*. *Journal of Chinese medicinal materials* 24: 24–25.
- Xu XQ, Ni H, Wei HY, Jia XG, Zhang BG, et al. (2013) Microscopic identification of three herba cistanches in Xin Jiang. *Shizhen Medicine and Materia Research* 24: 881–883.
- Zhang M, Fu XL, Wang SY (2004) Microscopic identification of commercial Herba Cistanches by digital imaging technique. *Journal of Chinese medicinal materials* 27: 400–402.
- Li JS, Yao ZQ, Yu MX (2000) Study on identification of herba cistanches and adulterants. *Shizhen Medicine and Materia Research* 11: 317–318.
- Xu R, Sun SQ, Liu YG, Chen J, Liu TN, et al. (2010) FTIR and 2D-IR spectroscopic studies on different sources of herba cistanches. *Guang Pu Xue Yu Guang Pu Fen Xi* 30: 897–900.
- Chen J, Sun SQ, Xu R, Liu YG, Yu J, et al. (2009) Identification of *Cistanche deserticola* from *Boschniakia rossica* and *Cynomorium songaricum* using FTIR and two-dimensional correlation IR spectroscopy. *Guang Pu Xue Yu Guang Pu Fen Xi* 29: 1502–1507.
- Yang HC, Xia PX, Huang JX, Yuan HZ (2008) Study on HPLC fingerprint of *Cistanche deserticola*. *Pharm Care & Res* 8: 255–257.
- Xie JN, Zhao MB, Wu FW, Tu PF (2005) Chromatographic fingerprint of *Cistanche deserticola* by HPLC. *Chinese Traditional and Herbal Drugs* 36: 268–271.
- Han JP, Song JY, Liu C, Chen J, Qian J, et al. (2010) Identification of *Cistanche* species (Orobanchaceae) based on sequences of the plastid *psbA-trnH* intergenic region. *Acta Pharmaceutica Sinica* 45: 126–130.
- Shi HM, Wang J, Wang MY, Tu PF, Li XB (2009) Identification of *Cistanche* Species by Chemical and Inter-simple Sequence Repeat Fingerprinting. *Biol. Pharm. Bull.*, 32: 142–146.
- Han LF, Yiadom MB, Liu EW, Zhang Y, Li W, et al. (2012) Structural Characterisation and Identification of Phenylethanoid Glycosides from *Cistanche deserticola* Y.C. Ma by UHPLC/ESI-QTOF-MS/MS. *Phytochemical analysis* 23: 668–676.
- Jiang X, Huang LF, Wu LB, Wang ZH, Chen SL (2012) UPLC-QTOF/MS Analysis of Alkaloids in Traditional Processed *Coptis chinensis* Franch. *Evid Based Complement Alternat Med* 2012: 942384.
- Wu LB, Jiang X, Huang LF, Chen SL (2013) Processing Technology Investigation of Loquat (*Eriobotrya japonica*) Leaf by Ultra-Performance Liquid Chromatography-Quadrupole Time-of-Flight Mass Spectrometry Combined with Chemometrics. *PLoS ONE* 8: e64178.
- Hebert PD, Ratnasingham S, Waard JR (2003) Barcoding animal life: cytochrome c oxidase subunit 1 divergences among closely related species. *Proc. R. Soc. Lond. B.*, 270 Suppl 1: S96–99.
- Hebert PD, Cywinska A, Ball SL, Waard JR (2003) Biological identifications through DNA barcodes. *Proc Biol Sci.*, 270: 313–321.
- Kress WJ, Wurdack KJ, Zimmer EA, Weigt LA, Janzen DH (2005) Use of DNA barcodes to identify flowering plants. *Proc Natl Acad Sci.*, 102: 8369–8374.
- Chen S, Yao H, Han J, Liu C, Song J, et al. (2010) Validation of the ITS2 region as a novel DNA barcode for identifying medicinal plant species. *PLoS One* 5: e8613.
- Tamura K, Peterson D, Peterson N, Stecher G, Nei M, et al. (2011) MEGA5: Molecular Evolutionary Genetics Analysis Using Maximum Likelihood, Evolutionary Distance, and Maximum Parsimony Methods. *Mol Biol Evol* 28: 2731–2739.
- Meyer CP, Paulay G (2005) DNA barcoding: error rates based on comprehensive sampling. *PLoS Biol* 3: e422.
- Kobayashi H, Karasawa H, Miyase T, Fukushima S (1984) Studies on the Constituents *Cistanchis Herba*. IV. Isolation and Structures of Two New Phenylpropanoid Glycosides, *Cistanosides C* and *D*. *Chem Pharm Bull* 32: 3880–3885.
- Kobayashi H, Karasawa H, Miyase T, Fukushima S (1985) Studies on the Constituents of *Cistanchis Herba*. VI. Isolation and Structures of a New Iridoid Glycoside, 6-Deoxyeatalpol. *Chem Pharm Bull* 33: 3645–3650.
- Jiang Y, Li SP, Wang YT, Chen XJ, Tu PF (2009) Differentiation of Herba *Cistanches* by fingerprint with high-performance liquid chromatography–diode array detection–mass spectrometry. *Journal of Chromatography A* 1216: 2156–2162.
- Han LF, Boakye YM, Liu E, Zhang Y, Li W, et al. (2012) Structural Characterisation and Identification of Phenylethanoid Glycosides from *Cistanche deserticola* Y.C. Ma by UHPLC/ESI-QTOF-MS/MS. *Phytochem Anal* 23: 668–676.
- Li L, Tsao R, Yang R, Liu CM, Young JC, et al. (2008) Isolation and purification of phenylethanoid glycosides from *Cistanche deserticola* by high-speed counter-current chromatography. *Food Chemistry* 108: 702–710.
- Lu DY, Zhang JY, Yang ZY, Liu HM, Li S, et al. (2013) Quantitative analysis of *Cistanches Herba* using high-performance liquid chromatography coupled with diode array detection and high-resolution mass spectrometry combined with chemometric methods. *J Sep Sci* 26: 1945–1952.
- Kobayashi H, Karasawa H, Miyase T, Fukushima S (1985) Studies on the Constituents *Cistanchis Herba*. V. Isolation and Structures of Two New Phenylpropanoid Glycosides, *Cistanoside E* and *F*. *Chem Pharm Bull* 33: 1452–1457.
- Jiang Y, Tu PF (2009) Analysis of chemical constituents in *Cistanche* species. *J Chromatogr A* 1216: 1970–1979.
- Massart DL, Vandeginste BGM, Deming SN, Michotte Y, Kaufman L (1988) Data handling in science and technology. *Chemometrics: a textbook*.
- Huang LF, Zheng SH, Wu LB, Jiang X, Chen SL (2014) Ecotypes of *Cistanche deserticola* based on chemical component and molecular traits. *SCIENTIA SINICA Vitae* 44: 318–328.
- Tu PF, Jiang Y, Guo YH (2011) research and industry development of herba cistanches. *Journal of Chinese pharmaceutical* 46: 882–887.
- Kobayashi H, Oguchi H, Takizawa, Miyase T, Ueno A, et al. (1987) New phenylethanoid glycosides from *Cistanche tubulosa* (SCHRENK) Hook. f. I. *Chem Pharm Bull* 35: 3309–3314.

41. Kobayashi H, Karasawa H, Miyase T, Fukushima S (1984) Studies on the constituents of *Cistanchis herba* III. *Chem Pharm Bull* 32: 3009–3014.
42. Kobayashi H, Karasawa H, Miyase T, Fukushima S (1984) Studies on the constituents of *Cistanchis herba* IV. *Chem Pharm Bull* 32: 3880–3885.
43. Kobayashi H, Karasawa H, Miyase T, Fukushima S (1985) Studies on the constituents of *Cistanchis herba* VI. *Chem Pharm Bull* 33: 3645–3650.
44. Moriya A, Tu PF, Karasawa D, Arima H, Deyama T, et al. (1995) Pharmacognostical studies of *Cistanchis Herba* (I). *Nat Med* 49: 383–393.
45. Moriya A, Tu PF, Karasawa D, Arima H, Deyama T, et al. (1995) Pharmacognostical studies of *Cistanchis Herba* (II). *Nat Med* 49: 394–400.
46. Liu XM, Jiang Y, Sun YQ, Xu XW, Tu PF (2011) Study on chemical constituents of *Cistanche deserticola*. *Chin Pharm J* 46: 1053–1058.
47. Gu XY, Wang X (2013) Identification between the Original Plants of *RouCongRong* and Confused Varieties. *Western Journal of Traditional Chinese Medicine* 26:17–18.
48. Zhang HJ, Ding XF Identification of *Cistanche deserticola* and adulterants. *Shizhen Medicine and Materia Research*, 183.
49. Xu XQ, Ni H, Wei HY, Jia XG, Zhang BG, et al. (2013) microscopic identification research of three kinds of *Cistanche* originated from Xinjiang province. *Shizhen Medicine and Materia Research* 24: 881–883.
50. Huang M, Liu G (2004) Identification research of *Cistanche deserticola* and *Cynomorium songaricum*. *HuBei journal of traditional Chinese medicine*. 26:54–55.
51. Liu YG, Xu R, Wang W, Liu TN, Chen J (2009) Research progress on quality control and assessment of *Cistanche deserticola* Y. C. Ma. *World Science and Technology- Modernization of Traditional Chinese Medicine*. 11:439–444.
52. Ma ZG (2011) Differentiation of processed *Cistanche sinensis* G.Beck and Herba *Cistanches* by HPLC fingerprints. *Chin. Pharm J*. 46: 899–902.
53. Huang LX, Wang YE, Shi MH, Jia XG, Xie X, et al. (2011) HPLC fingerprints research of *Cistanche tubulosa*. *Xinjiang journal of traditional Chinese medicine*. 29: 54–56.
54. Chen P, Guo YH, Wang BM, Zhai ZX (2006) SDS-PAGE of soluble proteins in four plants of *Cistanche Hoffing*. *Et Link. Chinese Traditional and Herbal Drugs* 37: 1399–1402.
55. Xu R, Chen J, Chen SL, Liu TN, Na R (2007) AFLP Analysis on diversity of germplasm resource in cultivated and wild *Cistanche deserticola*. *Chinese Traditional and Herbal Drugs* 38: 1703–1707.
56. Gan XY, Li M, Ma HA, Song YX (2011) Study on intraspecific variation of *Cistanche deserticola* Y.C.Ma using AFLP molecular markers. *Northern Horticulture*, 141–143.
